# Supplementary material for: Evolution of vibrational bands upon gradual protonation/deprotonation of arsinic acid H2As(O)OH in media of different polarity
Source: Royal Society of Chemistry journal article supplement (doi:10.1039/d2cp06060d), 2023-01-01

*Supporting Information for*

**Evolution of vibrational bands upon gradual protonation/deprotonation of arsenic acid  
 $\text{H}_2\text{As}(\text{O})\text{OH}$  in media of different polarity**

Elena Yu. Tupikina,<sup>a,\*</sup> Vladislav O. Korostelev,<sup>b</sup> Danil V. Krutin,<sup>a</sup> Peter M. Tolstoy,<sup>a,\*</sup>

<sup>a</sup> Institute of Chemistry, St. Petersburg State University, St. Petersburg, Russia

<sup>b</sup> Auburn University, Auburn, Alabama, United States of America

*Table of contents*

|                  |                                                                                                                                                                                                                              |    |
|------------------|------------------------------------------------------------------------------------------------------------------------------------------------------------------------------------------------------------------------------|----|
| <b>Table S1</b>  | Selected geometric and IR spectral parameters of complexes <b>4–44</b> with hydrogen bond $\text{AsO–H}\cdots\text{B}$ in a vacuum ( $\varepsilon = 1$ )                                                                     | 2  |
| <b>Table S2</b>  | Selected geometric and IR spectral parameters of complexes <b>4–44</b> with hydrogen bond $\text{AsO–H}\cdots\text{B}$ in a media with $\varepsilon = 5$                                                                     | 3  |
| <b>Table S3</b>  | Selected geometric and IR spectral parameters of complexes <b>4–44</b> with hydrogen bond $\text{AsO–H}\cdots\text{B}$ in a media with $\varepsilon = 10$                                                                    | 4  |
| <b>Table S4</b>  | Selected geometric and IR spectral parameters of complexes <b>4–44</b> with hydrogen bond $\text{AsO–H}\cdots\text{B}$ in a media with $\varepsilon = 20$                                                                    | 5  |
| <b>Table S5</b>  | Selected geometric and IR spectral parameters of complexes <b>4–44</b> with hydrogen bond $\text{AsO–H}\cdots\text{B}$ in a media with $\varepsilon = 40$                                                                    | 6  |
| <b>Table S6</b>  | Selected geometric and IR spectral parameters of complexes <b>4–44</b> with hydrogen bond $\text{AsO–H}\cdots\text{B}$ in a media with $\varepsilon = 80$                                                                    | 7  |
| <b>Table S7</b>  | Selected geometric and IR spectral parameters of complexes <b>45–82</b> with hydrogen bond $\text{As}=\text{O}\cdots\text{HA}$ in a vacuum ( $\varepsilon = 1$ )                                                             | 8  |
| <b>Table S8</b>  | Selected geometric and IR spectral parameters of complexes <b>45–82</b> with hydrogen bond $\text{As}=\text{O}\cdots\text{HA}$ in a media with $\varepsilon = 40$                                                            | 9  |
| <b>Table S9</b>  | Selected geometric and IR spectral parameters of complexes <b>45–82</b> with hydrogen bond $\text{As}=\text{O}\cdots\text{HA}$ in a media with $\varepsilon = 80$                                                            | 10 |
| <b>Table S10</b> | Selected geometric parameters of $\text{H}_2\text{As}(\text{O})\text{OH}$ monomer <b>1</b> in a dielectric continuum with various $\varepsilon$                                                                              | 11 |
| <b>Table S11</b> | Selected geometric parameters of $\text{H}_2\text{AsO}_2^-$ anion <b>2</b> in a dielectric continuum with various $\varepsilon$                                                                                              | 11 |
| <b>Table S12</b> | Selected geometric parameters of $\text{H}_2\text{As}(\text{OH})_2^+$ cation <b>3</b> in a dielectric continuum with various $\varepsilon$                                                                                   | 11 |
| <b>Figure S1</b> | The dependencies of the difference between the band positions $\Delta\nu = \nu_{\text{As}=\text{O}} - \nu_{\text{As}-\text{O}}$ and coordinate $q_1$ for complexes $\text{H}_2\text{As}(\text{O})\text{OH}\cdots\text{B}$ .  | 12 |
| <b>Figure S2</b> | The dependencies of the difference between the band positions $\Delta\nu = \nu_{\text{As}=\text{O}} - \nu_{\text{As}-\text{O}}$ and coordinate $q_1$ for complexes $\text{H}_2\text{As}(\text{OH})\text{O}\cdots\text{HA}$ . | 13 |

**Table S1.** Selected geometric and IR spectral parameters of complexes **4–44** with hydrogen bond AsO–H...B in a vacuum ( $\epsilon = 1$ ): interatomic distances ( $r_{\text{As=O}}$ ,  $r_{\text{As-O}}$ ,  $r_{\text{O-H}}$  and  $r_{\text{H...B}}$ ), angle ( $\angle\text{OHB}$ ) and stretching vibrational frequencies ( $\nu_{\text{As-O}}$ ,  $\nu_{\text{As=O}}$  and  $\nu_{\text{O-H}}$ ). Numbering of complexes in accordance with Scheme 2.

|           | $r_{\text{As=O}}$ ,<br>Å | $r_{\text{As-O}}$ ,<br>Å | $r_{\text{O-H}}$ ,<br>Å | $r_{\text{H...B}}$ ,<br>Å | $\angle\text{OHB}$ ,<br>° | $\nu_{\text{As=O}}$ ,<br>cm <sup>-1</sup> | $\nu_{\text{As-O}}$ ,<br>cm <sup>-1</sup> | $\nu_{\text{O-H}}$ ,<br>cm <sup>-1</sup> |
|-----------|--------------------------|--------------------------|-------------------------|---------------------------|---------------------------|-------------------------------------------|-------------------------------------------|------------------------------------------|
| <b>4</b>  | 1.631                    | 1.743                    | 0.993                   | 2.471                     | 155.1                     | 988.4                                     | 749.3                                     | 3334.9                                   |
| <b>5</b>  | 1.628                    | 1.746                    | 0.981                   | 2.387                     | 161.4                     | 993.3                                     | 749.4                                     | 3542.1                                   |
| <b>6</b>  | 1.630                    | 1.743                    | 0.981                   | 2.344                     | 175.5                     | 990.5                                     | 754.2                                     | 3575.0                                   |
| <b>7</b>  | 1.627                    | 1.744                    | 0.987                   | 2.270                     | 167.3                     | 998.5                                     | 753.6                                     | 3426.0                                   |
| <b>8</b>  | 1.632                    | 1.738                    | 1.002                   | 2.186                     | 156.5                     | 984.7                                     | 757.5                                     | 3172.2                                   |
| <b>9</b>  | 1.636                    | 1.732                    | 1.000                   | 2.169                     | 167.7                     | 974.2                                     | 775.0                                     | 3261.4                                   |
| <b>10</b> | 1.627                    | 1.746                    | 0.976                   | 2.063                     | 159.3                     | 998.8                                     | 749.1                                     | 3653.1                                   |
| <b>11</b> | 1.634                    | 1.732                    | 1.017                   | 1.953                     | 158.8                     | 981.5                                     | 768.0                                     | 2929.1                                   |
| <b>12</b> | 1.647                    | 1.730                    | 0.981                   | 1.885                     | 139.7                     | 938.5                                     | 777.1                                     | 3599.1                                   |
| <b>13</b> | 1.632                    | 1.739                    | 0.989                   | 1.874                     | 156.4                     | 983.5                                     | 761.5                                     | 3426.3                                   |
| <b>14</b> | 1.639                    | 1.732                    | 0.989                   | 1.826                     | 165.1                     | 977.3                                     | 766.6                                     | 3387.8                                   |
| <b>15</b> | 1.629                    | 1.737                    | 0.990                   | 1.768                     | 177.7                     | 994.0                                     | 770.3                                     | 3389.4                                   |
| <b>16</b> | 1.632                    | 1.734                    | 0.999                   | 1.771                     | 167.8                     | 987.5                                     | 772.0                                     | 3213.0                                   |
| <b>17</b> | 1.646                    | 1.725                    | 0.991                   | 1.762                     | 158.8                     | 956.9                                     | 788.1                                     | 3392.0                                   |
| <b>18</b> | 1.635                    | 1.735                    | 0.993                   | 1.765                     | 156.3                     | 977.3                                     | 770.9                                     | 3330.4                                   |
| <b>19</b> | 1.629                    | 1.739                    | 0.988                   | 1.759                     | 163.4                     | 994.0                                     | 763.6                                     | 3439.7                                   |
| <b>20</b> | 1.640                    | 1.724                    | 0.992                   | 1.724                     | 167.9                     | 968.4                                     | 792.7                                     | 3365.9                                   |
| <b>21</b> | 1.627                    | 1.738                    | 0.991                   | 1.714                     | 174.6                     | 1000.0                                    | 767.4                                     | 3349.9                                   |
| <b>22</b> | 1.630                    | 1.738                    | 0.992                   | 1.713                     | 159.6                     | 990.1                                     | 764.3                                     | 3363.4                                   |
| <b>23</b> | 1.630                    | 1.733                    | 1.007                   | 1.723                     | 178.6                     | 990.7                                     | 776.8                                     | 3038.9                                   |
| <b>24</b> | 1.636                    | 1.735                    | 1.001                   | 1.710                     | 159.0                     | 974.5                                     | 768.3                                     | 3170.9                                   |
| <b>25</b> | 1.632                    | 1.732                    | 1.013                   | 1.715                     | 164.9                     | 984.1                                     | 776.4                                     | 2949.3                                   |
| <b>26</b> | 1.632                    | 1.728                    | 1.015                   | 1.677                     | 173.7                     | 987.5                                     | 785.5                                     | 2901.9                                   |
| <b>27</b> | 1.630                    | 1.730                    | 1.016                   | 1.673                     | 179.6                     | 990.5                                     | 783.7                                     | 2869.3                                   |
| <b>28</b> | 1.643                    | 1.723                    | 1.003                   | 1.657                     | 165.2                     | 958.4                                     | 795.5                                     | 3146.8                                   |
| <b>29</b> | 1.640                    | 1.721                    | 1.020                   | 1.660                     | 171.2                     | 969.0                                     | 797.7                                     | 2801.6                                   |
| <b>30</b> | 1.633                    | 1.730                    | 1.027                   | 1.649                     | 165.9                     | 981.2                                     | 781.0                                     | 2687.5                                   |
| <b>31</b> | 1.632                    | 1.729                    | 1.023                   | 1.644                     | 161.2                     | 986.7                                     | 773.9                                     | 2796.2                                   |
| <b>32</b> | 1.631                    | 1.727                    | 1.024                   | 1.633                     | 178.7                     | 989.7                                     | 792.1                                     | 2714.1                                   |
| <b>33</b> | 1.636                    | 1.724                    | 1.025                   | 1.628                     | 167.9                     | 976.0                                     | 792.0                                     | 2742.6                                   |
| <b>34</b> | 1.632                    | 1.723                    | 1.034                   | 1.589                     | 166.2                     | 985.7                                     | 788.8                                     | 2603.0                                   |
| <b>35</b> | 1.636                    | 1.636                    | 1.036                   | 1.584                     | 170.9                     | 978.1                                     | 798.0                                     | 2542.1                                   |
| <b>36</b> | 1.641                    | 1.716                    | 1.059                   | 1.525                     | 172.1                     | 967.5                                     | 809.9                                     | 2157.8                                   |
| <b>37</b> | 1.666                    | 1.666                    | 1.477                   | 1.092                     | 176.6                     | 894.8                                     | 854.2                                     | 2364.0                                   |
| <b>38</b> | 1.645                    | 1.674                    | 1.467                   | 1.102                     | 179.0                     | 965.1                                     | 867.4                                     | 2111.1                                   |
| <b>39</b> | 1.646                    | 1.670                    | 1.546                   | 1.079                     | 179.0                     | 966.5                                     | 871.9                                     | 2459.0                                   |
| <b>40</b> | 1.649                    | 1.666                    | 1.709                   | 1.058                     | 179.7                     | 963.7                                     | 884.3                                     | 2894.1                                   |
| <b>41</b> | 1.659                    | 1.661                    | 1.844                   | 1.036                     | 168.8                     | 955.7                                     | 889.3                                     | 3542.1                                   |
| <b>42</b> | 1.656                    | 1.659                    | 2.029                   | 1.032                     | 151.3                     | 956.1                                     | 893.5                                     | 3337.1                                   |
| <b>43</b> | 1.650                    | 1.665                    | 2.327                   | 1.020                     | 116.9                     | 957.7                                     | 884.9                                     | 3523.4                                   |
| <b>44</b> | 1.668                    | 1.647                    | 2.402                   | 1.027                     | 174.4                     | 961.6                                     | 882.2                                     | 3418.6                                   |

**Table S2.** Selected geometric and IR spectral parameters of complexes **4–44** with hydrogen bond AsO–H...B in a media with  $\varepsilon = 5$ : interatomic distances ( $r_{\text{As=O}}$ ,  $r_{\text{As-O}}$ ,  $r_{\text{O-H}}$  and  $r_{\text{H...B}}$ ), angle ( $\angle\text{OHB}$ ) and stretching vibrational frequencies ( $\nu_{\text{As-O}}$ ,  $\nu_{\text{As=O}}$  and  $\nu_{\text{O-H}}$ ). Numbering of complexes in accordance with Scheme 2.

|           | $r_{\text{As=O}}$ ,<br>Å | $r_{\text{As-O}}$ ,<br>Å | $r_{\text{O-H}}$ ,<br>Å | $r_{\text{H...B}}$ ,<br>Å | $\angle\text{OHB}$ ,<br>° | $\nu_{\text{As=O}}$ ,<br>cm <sup>-1</sup> | $\nu_{\text{As-O}}$ ,<br>cm <sup>-1</sup> | $\nu_{\text{O-H}}$ ,<br>cm <sup>-1</sup> |
|-----------|--------------------------|--------------------------|-------------------------|---------------------------|---------------------------|-------------------------------------------|-------------------------------------------|------------------------------------------|
| <b>4</b>  | 1.632                    | 1.746                    | 0.988                   | 2.494                     | 156.6                     | 980.5                                     | 737.5                                     | 3414.0                                   |
| <b>5</b>  | 1.634                    | 1.749                    | 0.980                   | 2.421                     | 158.9                     | 973.6                                     | 733.5                                     | 3567.0                                   |
| <b>6</b>  | 1.634                    | 1.748                    | 0.981                   | 2.297                     | 173.4                     | 974.3                                     | 736.6                                     | 3555.9                                   |
| <b>7</b>  | 1.632                    | 1.746                    | 0.987                   | 2.256                     | 170.6                     | 979.7                                     | 741.0                                     | 3416.8                                   |
| <b>8</b>  | 1.633                    | 1.742                    | 0.995                   | 2.219                     | 157.7                     | 978.1                                     | 746.1                                     | 3288.1                                   |
| <b>9</b>  | 1.643                    | 1.737                    | 0.995                   | 2.204                     | 166.6                     | 956.1                                     | 757.3                                     | 3261.3                                   |
| <b>10</b> | 1.630                    | 1.745                    | 0.982                   | 1.887                     | 176.1                     | 985.3                                     | 745.7                                     | 3523.8                                   |
| <b>11</b> | 1.634                    | 1.737                    | 1.005                   | 1.993                     | 160.3                     | 974.7                                     | 753.9                                     | 3097.4                                   |
| <b>12</b> | 1.689                    | 1.715                    | 0.986                   | 1.825                     | 135.6                     | 859.1                                     | 795.2                                     | 3506.9                                   |
| <b>13</b> | 1.634                    | 1.741                    | 0.995                   | 1.784                     | 170.0                     | 978.4                                     | 752.1                                     | 3269.1                                   |
| <b>14</b> | 1.645                    | 1.739                    | 0.985                   | 1.900                     | 164.4                     | 952.4                                     | 750.8                                     | 3466.7                                   |
| <b>15</b> | 1.634                    | 1.741                    | 0.990                   | 1.754                     | 175.9                     | 975.7                                     | 754.6                                     | 3361.8                                   |
| <b>16</b> | 1.637                    | 1.738                    | 1.000                   | 1.752                     | 168.1                     | 970.7                                     | 759.4                                     | 3160.2                                   |
| <b>17</b> | 1.656                    | 1.728                    | 0.990                   | 1.766                     | 164.7                     | 856.4                                     | 775.7                                     | 3376.9                                   |
| <b>18</b> | 1.641                    | 1.740                    | 0.994                   | 1.760                     | 158.1                     | 957.0                                     | 755.4                                     | 3301.7                                   |
| <b>19</b> | 1.635                    | 1.741                    | 0.991                   | 1.722                     | 170.6                     | 976.1                                     | 752.3                                     | 3361.1                                   |
| <b>20</b> | 1.649                    | 1.729                    | 0.990                   | 1.748                     | 168.3                     | 947.6                                     | 773.4                                     | 3390.1                                   |
| <b>21</b> | 1.633                    | 1.740                    | 0.995                   | 1.682                     | 173.5                     | 979.1                                     | 756.6                                     | 3259.3                                   |
| <b>22</b> | 1.635                    | 1.738                    | 1.000                   | 1.643                     | 167.8                     | 971.8                                     | 756.6                                     | 3179.0                                   |
| <b>23</b> | 1.636                    | 1.735                    | 1.010                   | 1.701                     | 176.5                     | 971.9                                     | 765.3                                     | 2952.9                                   |
| <b>24</b> | 1.642                    | 1.739                    | 1.000                   | 1.717                     | 159.6                     | 954.6                                     | 752.2                                     | 3176.5                                   |
| <b>25</b> | 1.638                    | 1.732                    | 1.026                   | 1.641                     | 170.2                     | 966.9                                     | 770.7                                     | 2664.7                                   |
| <b>26</b> | 1.637                    | 1.731                    | 1.020                   | 1.650                     | 173.0                     | 969.4                                     | 770.9                                     | 2779.9                                   |
| <b>27</b> | 1.636                    | 1.732                    | 1.020                   | 1.654                     | 176.9                     | 971.8                                     | 771.2                                     | 2771.9                                   |
| <b>28</b> | 1.650                    | 1.727                    | 1.003                   | 1.657                     | 169.6                     | 944.0                                     | 779.0                                     | 3113.8                                   |
| <b>29</b> | 1.645                    | 1.728                    | 1.016                   | 1.674                     | 170.6                     | 953.2                                     | 776.9                                     | 2840.7                                   |
| <b>30</b> | 1.639                    | 1.728                    | 1.047                   | 1.568                     | 171.2                     | 964.7                                     | 778.5                                     | 2287.2                                   |
| <b>31</b> | 1.637                    | 1.729                    | 1.035                   | 1.589                     | 169.5                     | 972.0                                     | 772.1                                     | 2536.9                                   |
| <b>32</b> | 1.637                    | 1.729                    | 1.032                   | 1.602                     | 176.2                     | 970.7                                     | 782.0                                     | 2550.1                                   |
| <b>33</b> | 1.640                    | 1.727                    | 1.035                   | 1.584                     | 171.8                     | 963.1                                     | 776.3                                     | 2489.7                                   |
| <b>34</b> | 1.635                    | 1.727                    | 1.025                   | 1.599                     | 174.4                     | 974.6                                     | 779.4                                     | 2685.3                                   |
| <b>35</b> | 1.641                    | 1.722                    | 1.058                   | 1.518                     | 175.1                     | 959.4                                     | 783.2                                     | 2126.7                                   |
| <b>36</b> | 1.645                    | 1.718                    | 1.064                   | 1.514                     | 176.4                     | 955.2                                     | 803.8                                     | 2017.1                                   |
| <b>37</b> | 1.667                    | 1.667                    | 1.595                   | 1.059                     | 175.8                     | 879.8                                     | 870.6                                     | 2747.3                                   |
| <b>38</b> | 1.653                    | 1.671                    | 1.610                   | 1.061                     | 178.0                     | 916.8                                     | 866.4                                     | 2702.8                                   |
| <b>39</b> | 1.654                    | 1.669                    | 1.690                   | 1.049                     | 178.6                     | 921.2                                     | 871.6                                     | 2905.9                                   |
| <b>40</b> | 1.655                    | 1.667                    | 1.805                   | 1.046                     | 177.4                     | 919.4                                     | 878.8                                     | 3068.4                                   |
| <b>41</b> | 1.656                    | 1.673                    | 1.920                   | 1.030                     | 156.4                     | 910.3                                     | 863.9                                     | 3306.9                                   |
| <b>42</b> | 1.661                    | 1.663                    | 1.927                   | 1.032                     | 178.3                     | 903.9                                     | 883.6                                     | 3266.7                                   |
| <b>43</b> | 1.664                    | 1.659                    | 2.128                   | 1.025                     | 177.0                     | 904.6                                     | 888.4                                     | 3417.5                                   |
| <b>44</b> | 1.656                    | 1.669                    | 2.344                   | 1.024                     | 121.1                     | 908.2                                     | 870.3                                     | 3467.4                                   |

**Table S3.** Selected of geometric and IR spectral parameters of complexes **4–44** with hydrogen bond AsO–H...B in a media with  $\varepsilon = 10$ : interatomic distances ( $r_{\text{As=O}}$ ,  $r_{\text{As-O}}$ ,  $r_{\text{O-H}}$  and  $r_{\text{H...B}}$ ), angle ( $\angle\text{OHB}$ ) and stretching vibrational frequencies ( $\nu_{\text{As=O}}$ ,  $\nu_{\text{As-O}}$  and  $\nu_{\text{O-H}}$ ). Numbering of complexes in accordance with Scheme 2.

|           | $r_{\text{As=O}}$ ,<br>Å | $r_{\text{As-O}}$ ,<br>Å | $r_{\text{O-H}}$ ,<br>Å | $r_{\text{H...B}}$ ,<br>Å | $\angle\text{OHB}$ ,<br>° | $\nu_{\text{As=O}}$ ,<br>cm <sup>-1</sup> | $\nu_{\text{As-O}}$ ,<br>cm <sup>-1</sup> | $\nu_{\text{O-H}}$ ,<br>cm <sup>-1</sup> |
|-----------|--------------------------|--------------------------|-------------------------|---------------------------|---------------------------|-------------------------------------------|-------------------------------------------|------------------------------------------|
| <b>4</b>  | 1.632                    | 1.746                    | 0.987                   | 2.492                     | 157.6                     | 978.0                                     | 735.7                                     | 3418.9                                   |
| <b>5</b>  | 1.636                    | 1.750                    | 0.979                   | 2.435                     | 157.8                     | 969.4                                     | 730.6                                     | 3576.6                                   |
| <b>6</b>  | 1.635                    | 1.748                    | 0.981                   | 2.274                     | 173.7                     | 971.1                                     | 733.2                                     | 3552.0                                   |
| <b>7</b>  | 1.634                    | 1.746                    | 0.987                   | 2.254                     | 171.1                     | 975.5                                     | 738.8                                     | 3414.1                                   |
| <b>8</b>  | 1.633                    | 1.743                    | 0.994                   | 2.215                     | 159.4                     | 975.6                                     | 742.9                                     | 3291.9                                   |
| <b>9</b>  | 1.645                    | 1.738                    | 0.994                   | 2.213                     | 166.1                     | 952.5                                     | 754.1                                     | 3277.5                                   |
| <b>10</b> | 1.632                    | 1.744                    | 0.983                   | 1.878                     | 177.4                     | 979.9                                     | 744.6                                     | 3512.0                                   |
| <b>11</b> | 1.634                    | 1.737                    | 1.005                   | 1.985                     | 163.4                     | 973.5                                     | 753.6                                     | 3085.0                                   |
| <b>12</b> | 1.691                    | 1.715                    | 0.987                   | 1.806                     | 138.5                     | 852.2                                     | 794.6                                     | 3473.6                                   |
| <b>13</b> | 1.635                    | 1.742                    | 0.994                   | 1.794                     | 166.7                     | 974.2                                     | 747.5                                     | 3291.0                                   |
| <b>14</b> | 1.646                    | 1.740                    | 0.983                   | 1.925                     | 163.9                     | 948.5                                     | 746.7                                     | 3491.5                                   |
| <b>15</b> | 1.635                    | 1.741                    | 0.990                   | 1.752                     | 175.7                     | 971.9                                     | 751.5                                     | 3357.8                                   |
| <b>16</b> | 1.638                    | 1.739                    | 1.001                   | 1.748                     | 168.2                     | 964.0                                     | 757.6                                     | 3150.6                                   |
| <b>17</b> | 1.659                    | 1.728                    | 0.991                   | 1.763                     | 165.9                     | 838.0                                     | 774.1                                     | 3367.3                                   |
| <b>18</b> | 1.643                    | 1.740                    | 0.993                   | 1.761                     | 158.3                     | 953.1                                     | 752.5                                     | 3300.6                                   |
| <b>19</b> | 1.636                    | 1.742                    | 0.991                   | 1.717                     | 172.4                     | 969.2                                     | 750.3                                     | 3348.1                                   |
| <b>20</b> | 1.651                    | 1.730                    | 0.990                   | 1.746                     | 169.3                     | 882.5                                     | 771.2                                     | 3384.1                                   |
| <b>21</b> | 1.634                    | 1.740                    | 0.996                   | 1.678                     | 173.0                     | 974.5                                     | 754.8                                     | 3244.7                                   |
| <b>22</b> | 1.637                    | 1.739                    | 1.001                   | 1.636                     | 168.7                     | 967.7                                     | 754.9                                     | 3151.2                                   |
| <b>23</b> | 1.637                    | 1.735                    | 1.010                   | 1.700                     | 175.8                     | 967.7                                     | 762.5                                     | 2945.6                                   |
| <b>24</b> | 1.644                    | 1.740                    | 0.999                   | 1.721                     | 159.6                     | 950.9                                     | 749.0                                     | 3184.0                                   |
| <b>25</b> | 1.639                    | 1.731                    | 1.029                   | 1.626                     | 171.7                     | 964.1                                     | 770.8                                     | 2597.0                                   |
| <b>26</b> | 1.638                    | 1.732                    | 1.021                   | 1.644                     | 173.1                     | 967.3                                     | 770.0                                     | 2777.4                                   |
| <b>27</b> | 1.637                    | 1.732                    | 1.020                   | 1.650                     | 176.6                     | 967.9                                     | 768.8                                     | 2752.5                                   |
| <b>28</b> | 1.651                    | 1.728                    | 1.003                   | 1.659                     | 170.3                     | 893.6                                     | 775.5                                     | 3115.4                                   |
| <b>29</b> | 1.646                    | 1.729                    | 1.015                   | 1.679                     | 170.3                     | 949.8                                     | 772.3                                     | 2856.1                                   |
| <b>30</b> | 1.638                    | 1.727                    | 1.043                   | 1.580                     | 175.2                     | 967.6                                     | 782.3                                     | 2326.1                                   |
| <b>31</b> | 1.638                    | 1.730                    | 1.033                   | 1.593                     | 170.5                     | 966.6                                     | 769.4                                     | 2556.0                                   |
| <b>32</b> | 1.638                    | 1.729                    | 1.034                   | 1.595                     | 176.2                     | 965.3                                     | 763.9                                     | 2513.1                                   |
| <b>33</b> | 1.640                    | 1.728                    | 1.037                   | 1.579                     | 172.0                     | 959.4                                     | 772.1                                     | 2534.5                                   |
| <b>34</b> | 1.636                    | 1.729                    | 1.020                   | 1.618                     | 175.0                     | 970.8                                     | 774.4                                     | 2764.9                                   |
| <b>35</b> | 1.642                    | 1.722                    | 1.065                   | 1.500                     | 176.1                     | 957.3                                     | 782.3                                     | 2004.0                                   |
| <b>36</b> | 1.646                    | 1.718                    | 1.070                   | 1.502                     | 176.7                     | 952.4                                     | 790.7                                     | 1928.5                                   |
| <b>37</b> | 1.668                    | 1.668                    | 1.618                   | 1.054                     | 175.7                     | 877.1                                     | 869.5                                     | 2814.0                                   |
| <b>38</b> | 1.655                    | 1.672                    | 1.632                   | 1.056                     | 177.7                     | 910.8                                     | 864.5                                     | 2766.2                                   |
| <b>39</b> | 1.656                    | 1.670                    | 1.712                   | 1.046                     | 178.9                     | 911.3                                     | 868.6                                     | 2960.3                                   |
| <b>40</b> | 1.657                    | 1.668                    | 1.817                   | 1.045                     | 176.3                     | 907.1                                     | 874.8                                     | 3080.0                                   |
| <b>41</b> | 1.658                    | 1.674                    | 1.962                   | 1.030                     | 156.8                     | 898.5                                     | 859.9                                     | 3307.7                                   |
| <b>42</b> | 1.661                    | 1.665                    | 1.925                   | 1.032                     | 179.8                     | 898.3                                     | 880.1                                     | 3265.7                                   |
| <b>43</b> | 1.664                    | 1.661                    | 2.115                   | 1.025                     | 177.8                     | 899.4                                     | 885.6                                     | 3410.3                                   |
| <b>44</b> | 1.657                    | 1.671                    | 2.620                   | 1.023                     | 112.2                     | 904.7                                     | 867.1                                     | 3472.0                                   |

**Table S4.** Selected of geometric and IR spectral parameters of complexes **4–44** with hydrogen bond AsO–H...B in a media with  $\varepsilon = 20$ : interatomic distances ( $r_{\text{As=O}}$ ,  $r_{\text{As-O}}$ ,  $r_{\text{O-H}}$  and  $r_{\text{H...B}}$ ), angle ( $\angle\text{OHB}$ ) and stretching vibrational frequencies ( $\nu_{\text{As=O}}$ ,  $\nu_{\text{As-O}}$  and  $\nu_{\text{O-H}}$ ). Numbering of complexes in accordance with Scheme 2.

|           | $r_{\text{As=O}}$ ,<br>Å | $r_{\text{As-O}}$ ,<br>Å | $r_{\text{O-H}}$ ,<br>Å | $r_{\text{H...B}}$ ,<br>Å | $\angle\text{OHB}$ ,<br>° | $\nu_{\text{As=O}}$ ,<br>cm <sup>-1</sup> | $\nu_{\text{As-O}}$ ,<br>cm <sup>-1</sup> | $\nu_{\text{O-H}}$ ,<br>cm <sup>-1</sup> |
|-----------|--------------------------|--------------------------|-------------------------|---------------------------|---------------------------|-------------------------------------------|-------------------------------------------|------------------------------------------|
| <b>4</b>  | 1.632                    | 1.747                    | 0.987                   | 2.488                     | 159.0                     | 976.6                                     | 734.6                                     | 3416.7                                   |
| <b>5</b>  | 1.636                    | 1.750                    | 0.979                   | 2.445                     | 157.1                     | 967.0                                     | 729.0                                     | 3582.7                                   |
| <b>6</b>  | 1.635                    | 1.749                    | 0.981                   | 2.254                     | 174.3                     | 969.8                                     | 731.4                                     | 3549.2                                   |
| <b>7</b>  | 1.635                    | 1.747                    | 0.987                   | 2.252                     | 171.3                     | 972.8                                     | 737.6                                     | 3412.3                                   |
| <b>8</b>  | 1.633                    | 1.743                    | 0.994                   | 2.210                     | 161.3                     | 974.5                                     | 741.8                                     | 3286.1                                   |
| <b>9</b>  | 1.646                    | 1.738                    | 0.993                   | 2.219                     | 165.8                     | 950.3                                     | 752.3                                     | 3287.9                                   |
| <b>10</b> | 1.633                    | 1.744                    | 0.983                   | 1.874                     | 178.0                     | 976.6                                     | 743.8                                     | 3505.2                                   |
| <b>11</b> | 1.634                    | 1.738                    | 1.005                   | 1.985                     | 164.6                     | 972.6                                     | 752.4                                     | 3088.4                                   |
| <b>12</b> | 1.693                    | 1.714                    | 0.988                   | 1.794                     | 140.2                     | 848.0                                     | 794.2                                     | 3452.6                                   |
| <b>13</b> | 1.635                    | 1.743                    | 0.994                   | 1.791                     | 166.8                     | 974.2                                     | 747.5                                     | 3291.0                                   |
| <b>14</b> | 1.647                    | 1.741                    | 0.983                   | 1.942                     | 163.6                     | 946.5                                     | 743.7                                     | 3507.6                                   |
| <b>15</b> | 1.636                    | 1.742                    | 0.990                   | 1.752                     | 175.7                     | 968.1                                     | 747.8                                     | 3357.5                                   |
| <b>16</b> | 1.638                    | 1.739                    | 1.001                   | 1.747                     | 168.2                     | 962.9                                     | 756.8                                     | 3145.4                                   |
| <b>17</b> | 1.695                    | 1.714                    | 0.988                   | 1.796                     | 139.7                     | 842.4                                     | 795.7                                     | 3451.6                                   |
| <b>18</b> | 1.643                    | 1.741                    | 0.993                   | 1.763                     | 158.3                     | 950.8                                     | 750.9                                     | 3301.8                                   |
| <b>19</b> | 1.636                    | 1.742                    | 0.991                   | 1.715                     | 173.4                     | 967.7                                     | 749.3                                     | 3341.4                                   |
| <b>20</b> | 1.652                    | 1.730                    | 0.990                   | 1.746                     | 169.7                     | 879.3                                     | 769.6                                     | 3381.1                                   |
| <b>21</b> | 1.635                    | 1.740                    | 0.996                   | 1.675                     | 172.7                     | 971.6                                     | 753.7                                     | 3235.5                                   |
| <b>22</b> | 1.637                    | 1.739                    | 1.001                   | 1.633                     | 169.2                     | 965.7                                     | 754.0                                     | 3137.4                                   |
| <b>23</b> | 1.638                    | 1.736                    | 1.010                   | 1.699                     | 175.4                     | 965.3                                     | 760.8                                     | 2941.7                                   |
| <b>24</b> | 1.645                    | 1.740                    | 0.999                   | 1.724                     | 159.6                     | 948.9                                     | 747.2                                     | 3189.6                                   |
| <b>25</b> | 1.637                    | 1.730                    | 1.023                   | 1.648                     | 179.1                     | 968.1                                     | 774.4                                     | 2690.2                                   |
| <b>26</b> | 1.639                    | 1.732                    | 1.021                   | 1.641                     | 173.3                     | 964.0                                     | 766.5                                     | 2739.3                                   |
| <b>27</b> | 1.638                    | 1.733                    | 1.021                   | 1.648                     | 176.4                     | 965.6                                     | 767.4                                     | 2742.3                                   |
| <b>28</b> | 1.652                    | 1.729                    | 1.003                   | 1.661                     | 170.7                     | 892.1                                     | 773.5                                     | 3117.5                                   |
| <b>29</b> | 1.647                    | 1.730                    | 1.015                   | 1.683                     | 170.0                     | 947.9                                     | 769.8                                     | 2867.6                                   |
| <b>30</b> | 1.638                    | 1.727                    | 1.042                   | 1.584                     | 179.0                     | 965.5                                     | 782.0                                     | 2329.1                                   |
| <b>31</b> | 1.639                    | 1.730                    | 1.032                   | 1.596                     | 171.2                     | 963.6                                     | 768.0                                     | 2565.6                                   |
| <b>32</b> | 1.639                    | 1.729                    | 1.035                   | 1.591                     | 176.4                     | 963.5                                     | 780.5                                     | 2492.1                                   |
| <b>33</b> | 1.641                    | 1.729                    | 1.037                   | 1.576                     | 172.3                     | 958.2                                     | 771.1                                     | 2459.8                                   |
| <b>34</b> | 1.637                    | 1.730                    | 1.018                   | 1.630                     | 176.6                     | 968.7                                     | 772.7                                     | 2808.9                                   |
| <b>35</b> | 1.643                    | 1.722                    | 1.070                   | 1.489                     | 176.7                     | 956.6                                     | 781.7                                     | 1917.6                                   |
| <b>36</b> | 1.647                    | 1.718                    | 1.074                   | 1.492                     | 176.9                     | 950.8                                     | 802.2                                     | 1859.3                                   |
| <b>37</b> | 1.668                    | 1.668                    | 1.630                   | 1.051                     | 175.5                     | 875.8                                     | 868.5                                     | 2849.1                                   |
| <b>38</b> | 1.659                    | 1.670                    | 1.750                   | 1.042                     | 178.3                     | 898.6                                     | 869.1                                     | 3035.5                                   |
| <b>39</b> | 1.657                    | 1.670                    | 1.722                   | 1.045                     | 178.6                     | 906.3                                     | 866.9                                     | 2986.6                                   |
| <b>40</b> | 1.658                    | 1.668                    | 1.824                   | 1.045                     | 174.6                     | 904.2                                     | 871.4                                     | 3079.1                                   |
| <b>41</b> | 1.659                    | 1.674                    | 1.942                   | 1.029                     | 155.6                     | 897.7                                     | 859.3                                     | 3308.7                                   |
| <b>42</b> | 1.661                    | 1.665                    | 1.925                   | 1.032                     | 179.1                     | 895.1                                     | 878.1                                     | 3265.1                                   |
| <b>43</b> | 1.664                    | 1.662                    | 2.109                   | 1.025                     | 177.9                     | 896.1                                     | 883.6                                     | 3406.3                                   |
| <b>44</b> | 1.658                    | 1.670                    | 2.621                   | 1.023                     | 113.1                     | 900.4                                     | 868.0                                     | 3472.0                                   |

**Table S5.** Selected of geometric and IR spectral parameters of complexes **4–44** with hydrogen bond AsO–H...B in a media with  $\varepsilon = 40$ : interatomic distances ( $r_{\text{As=O}}$ ,  $r_{\text{As-O}}$ ,  $r_{\text{O-H}}$  and  $r_{\text{H...B}}$ ), angle ( $\angle\text{OHB}$ ) and stretching vibrational frequencies ( $\nu_{\text{As=O}}$ ,  $\nu_{\text{As-O}}$  and  $\nu_{\text{O-H}}$ ). Numbering of complexes in accordance with Scheme 2.

|           | $r_{\text{As=O}}$ ,<br>Å | $r_{\text{As-O}}$ ,<br>Å | $r_{\text{O-H}}$ ,<br>Å | $r_{\text{H...B}}$ ,<br>Å | $\angle\text{OHB}$ ,<br>° | $\nu_{\text{As=O}}$ ,<br>cm <sup>-1</sup> | $\nu_{\text{As-O}}$ ,<br>cm <sup>-1</sup> | $\nu_{\text{O-H}}$ ,<br>cm <sup>-1</sup> |
|-----------|--------------------------|--------------------------|-------------------------|---------------------------|---------------------------|-------------------------------------------|-------------------------------------------|------------------------------------------|
| <b>4</b>  | 1.632                    | 1.747                    | 0.987                   | 2.485                     | 159.9                     | 975.9                                     | 733.9                                     | 3414.8                                   |
| <b>5</b>  | 1.637                    | 1.750                    | 0.979                   | 2.451                     | 156.7                     | 965.7                                     | 728.2                                     | 3586.2                                   |
| <b>6</b>  | 1.635                    | 1.749                    | 0.981                   | 2.243                     | 174.7                     | 969.2                                     | 730.6                                     | 3547.8                                   |
| <b>7</b>  | 1.635                    | 1.747                    | 0.987                   | 2.252                     | 171.3                     | 971.5                                     | 736.9                                     | 3411.6                                   |
| <b>8</b>  | 1.633                    | 1.743                    | 0.994                   | 2.206                     | 162.5                     | 973.9                                     | 741.6                                     | 3281.0                                   |
| <b>9</b>  | 1.646                    | 1.739                    | 0.993                   | 2.223                     | 165.6                     | 949.2                                     | 751.4                                     | 3293.8                                   |
| <b>10</b> | 1.634                    | 1.744                    | 0.983                   | 1.873                     | 178.3                     | 974.8                                     | 743.2                                     | 3501.7                                   |
| <b>11</b> | 1.634                    | 1.738                    | 1.005                   | 1.983                     | 165.6                     | 971.9                                     | 751.9                                     | 3086.7                                   |
| <b>12</b> | 1.694                    | 1.714                    | 0.989                   | 1.785                     | 141.4                     | 845.7                                     | 794.2                                     | 3436.6                                   |
| <b>13</b> | 1.636                    | 1.743                    | 0.994                   | 1.790                     | 166.8                     | 970.1                                     | 745.0                                     | 3283.0                                   |
| <b>14</b> | 1.647                    | 1.741                    | 0.982                   | 1.953                     | 163.3                     | 945.4                                     | 742.7                                     | 3517.1                                   |
| <b>15</b> | 1.636                    | 1.742                    | 0.990                   | 1.751                     | 175.7                     | 968.6                                     | 748.3                                     | 3357.1                                   |
| <b>16</b> | 1.639                    | 1.739                    | 1.001                   | 1.746                     | 168.1                     | 962.1                                     | 756.5                                     | 3143.6                                   |
| <b>17</b> | 1.695                    | 1.714                    | 0.989                   | 1.790                     | 140.6                     | 841.0                                     | 795.9                                     | 3442.8                                   |
| <b>18</b> | 1.644                    | 1.741                    | 0.993                   | 1.765                     | 158.2                     | 949.8                                     | 750.3                                     | 3303.6                                   |
| <b>19</b> | 1.637                    | 1.742                    | 0.991                   | 1.714                     | 173.9                     | 966.7                                     | 748.8                                     | 3338.0                                   |
| <b>20</b> | 1.653                    | 1.730                    | 0.990                   | 1.746                     | 170.0                     | 940.8                                     | 768.8                                     | 3379.7                                   |
| <b>21</b> | 1.636                    | 1.740                    | 0.996                   | 1.674                     | 172.5                     | 969.9                                     | 753.1                                     | 3230.8                                   |
| <b>22</b> | 1.638                    | 1.739                    | 1.002                   | 1.631                     | 169.4                     | 964.7                                     | 753.5                                     | 3129.5                                   |
| <b>23</b> | 1.638                    | 1.736                    | 1.010                   | 1.698                     | 175.3                     | 964.0                                     | 760.0                                     | 2938.3                                   |
| <b>24</b> | 1.645                    | 1.741                    | 0.999                   | 1.726                     | 159.6                     | 947.8                                     | 746.2                                     | 3193.0                                   |
| <b>25</b> | 1.638                    | 1.730                    | 1.024                   | 1.644                     | 179.1                     | 966.5                                     | 774.4                                     | 2669.0                                   |
| <b>26</b> | 1.639                    | 1.732                    | 1.022                   | 1.640                     | 173.2                     | 962.9                                     | 766.0                                     | 2739.8                                   |
| <b>27</b> | 1.639                    | 1.733                    | 1.021                   | 1.646                     | 176.3                     | 964.3                                     | 766.8                                     | 2736.1                                   |
| <b>28</b> | 1.653                    | 1.729                    | 1.002                   | 1.662                     | 170.9                     | 940.7                                     | 772.4                                     | 3118.9                                   |
| <b>29</b> | 1.647                    | 1.731                    | 1.014                   | 1.685                     | 169.9                     | 947.1                                     | 768.5                                     | 2873.2                                   |
| <b>30</b> | 1.639                    | 1.727                    | 1.043                   | 1.579                     | 176.9                     | 963.9                                     | 781.5                                     | 2319.4                                   |
| <b>31</b> | 1.639                    | 1.731                    | 1.032                   | 1.597                     | 171.7                     | 962.0                                     | 767.3                                     | 2571.9                                   |
| <b>32</b> | 1.639                    | 1.729                    | 1.010                   | 1.589                     | 176.4                     | 962.3                                     | 762.9                                     | 2482.3                                   |
| <b>33</b> | 1.641                    | 1.729                    | 1.038                   | 1.574                     | 172.5                     | 957.4                                     | 770.5                                     | 2449.5                                   |
| <b>34</b> | 1.637                    | 1.731                    | 1.016                   | 1.636                     | 176.6                     | 967.3                                     | 770.5                                     | 2834.2                                   |
| <b>35</b> | 1.643                    | 1.721                    | 1.073                   | 1.481                     | 177.0                     | 951.1                                     | 781.4                                     | 1864.7                                   |
| <b>36</b> | 1.648                    | 1.718                    | 1.076                   | 1.486                     | 177.0                     | 949.9                                     | 801.9                                     | 1814.1                                   |
| <b>37</b> | 1.668                    | 1.668                    | 1.637                   | 1.050                     | 175.5                     | 875.0                                     | 867.9                                     | 2867.0                                   |
| <b>38</b> | 1.659                    | 1.670                    | 1.747                   | 1.042                     | 178.4                     | 897.3                                     | 867.8                                     | 3032.9                                   |
| <b>39</b> | 1.657                    | 1.670                    | 1.727                   | 1.044                     | 178.3                     | 904.0                                     | 866.0                                     | 2998.8                                   |
| <b>40</b> | 1.658                    | 1.669                    | 1.828                   | 1.045                     | 174.5                     | 901.7                                     | 870.4                                     | 3082.7                                   |
| <b>41</b> | 1.674                    | 1.659                    | 2.243                   | 1.025                     | 161.0                     | 858.5                                     | 895.1                                     | 3438.6                                   |
| <b>42</b> | 1.662                    | 1.666                    | 1.924                   | 1.032                     | 178.6                     | 893.6                                     | 877.0                                     | 3264.6                                   |
| <b>43</b> | 1.664                    | 1.663                    | 2.106                   | 1.025                     | 177.9                     | 894.3                                     | 882.6                                     | 3404.1                                   |
| <b>44</b> | 1.670                    | 1.659                    | 2.584                   | 1.023                     | 159.4                     | 868.3                                     | 898.1                                     | 3471.4                                   |

**Table S6.** Selected of geometric and IR spectral parameters of complexes **4–44** with hydrogen bond AsO–H...B in a media with  $\varepsilon = 80$ : interatomic distances ( $r_{\text{As=O}}$ ,  $r_{\text{As-O}}$ ,  $r_{\text{O-H}}$  and  $r_{\text{H...B}}$ ), angle ( $\angle\text{OHB}$ ) and stretching vibrational frequencies ( $\nu_{\text{As=O}}$ ,  $\nu_{\text{As-O}}$  and  $\nu_{\text{O-H}}$ ). Numbering of complexes in accordance with Scheme 2.

|           | $r_{\text{As=O}}$ ,<br>Å | $r_{\text{As-O}}$ ,<br>Å | $r_{\text{O-H}}$ ,<br>Å | $r_{\text{H...B}}$ ,<br>Å | $\angle\text{OHB}$ ,<br>° | $\nu_{\text{As=O}}$ ,<br>cm <sup>-1</sup> | $\nu_{\text{As-O}}$ ,<br>cm <sup>-1</sup> | $\nu_{\text{O-H}}$ ,<br>cm <sup>-1</sup> |
|-----------|--------------------------|--------------------------|-------------------------|---------------------------|---------------------------|-------------------------------------------|-------------------------------------------|------------------------------------------|
| <b>4</b>  | 1.633                    | 1.747                    | 0.987                   | 2.483                     | 160.4                     | 975.6                                     | 733.4                                     | 3413.8                                   |
| <b>5</b>  | 1.637                    | 1.750                    | 0.979                   | 2.454                     | 156.4                     | 965.0                                     | 727.7                                     | 3588.1                                   |
| <b>6</b>  | 1.635                    | 1.749                    | 0.981                   | 2.236                     | 175.1                     | 968.9                                     | 730.1                                     | 3547.0                                   |
| <b>7</b>  | 1.635                    | 1.747                    | 0.987                   | 2.251                     | 171.3                     | 970.8                                     | 736.4                                     | 3411.5                                   |
| <b>8</b>  | 1.633                    | 1.743                    | 0.994                   | 2.205                     | 163.0                     | 973.6                                     | 741.3                                     | 3279.8                                   |
| <b>9</b>  | 1.646                    | 1.739                    | 0.993                   | 2.225                     | 165.4                     | 948.6                                     | 750.9                                     | 3297.0                                   |
| <b>10</b> | 1.634                    | 1.744                    | 0.983                   | 1.872                     | 178.5                     | 973.9                                     | 743.0                                     | 3500.0                                   |
| <b>11</b> | 1.634                    | 1.738                    | 1.005                   | 1.982                     | 166.2                     | 971.6                                     | 751.8                                     | 3085.1                                   |
| <b>12</b> | 1.694                    | 1.714                    | 0.990                   | 1.778                     | 142.2                     | 844.4                                     | 794.2                                     | 3426.5                                   |
| <b>13</b> | 1.636                    | 1.743                    | 0.994                   | 1.790                     | 166.7                     | 969.3                                     | 744.4                                     | 3282.0                                   |
| <b>14</b> | 1.648                    | 1.742                    | 0.982                   | 1.960                     | 163.2                     | 944.8                                     | 741.8                                     | 3521.1                                   |
| <b>15</b> | 1.636                    | 1.742                    | 0.990                   | 1.752                     | 175.7                     | 968.1                                     | 747.8                                     | 3357.5                                   |
| <b>16</b> | 1.639                    | 1.740                    | 1.001                   | 1.746                     | 168.0                     | 961.6                                     | 756.2                                     | 3143.6                                   |
| <b>17</b> | 1.696                    | 1.714                    | 0.989                   | 1.788                     | 141.0                     | 840.3                                     | 796.1                                     | 3438.4                                   |
| <b>18</b> | 1.644                    | 1.741                    | 0.993                   | 1.766                     | 158.1                     | 949.3                                     | 750.2                                     | 3305.0                                   |
| <b>19</b> | 1.637                    | 1.742                    | 0.992                   | 1.713                     | 174.2                     | 966.2                                     | 748.5                                     | 3336.4                                   |
| <b>20</b> | 1.653                    | 1.731                    | 0.990                   | 1.746                     | 170.1                     | 876.5                                     | 768.2                                     | 3379.0                                   |
| <b>21</b> | 1.627                    | 1.738                    | 0.991                   | 1.714                     | 174.6                     | 1000.0                                    | 767.4                                     | 3349.9                                   |
| <b>22</b> | 1.638                    | 1.739                    | 1.002                   | 1.630                     | 169.5                     | 964.2                                     | 753.2                                     | 3125.6                                   |
| <b>23</b> | 1.639                    | 1.736                    | 1.010                   | 1.698                     | 175.2                     | 963.3                                     | 759.6                                     | 2936.0                                   |
| <b>24</b> | 1.645                    | 1.741                    | 0.998                   | 1.727                     | 159.6                     | 947.3                                     | 745.7                                     | 3194.9                                   |
| <b>25</b> | 1.638                    | 1.730                    | 1.025                   | 1.641                     | 179.0                     | 965.7                                     | 774.6                                     | 2657.1                                   |
| <b>26</b> | 1.639                    | 1.732                    | 1.022                   | 1.639                     | 173.3                     | 962.4                                     | 765.1                                     | 2730.4                                   |
| <b>27</b> | 1.639                    | 1.733                    | 1.021                   | 1.645                     | 176.2                     | 963.5                                     | 766.3                                     | 2733.1                                   |
| <b>28</b> | 1.653                    | 1.729                    | 1.002                   | 1.663                     | 171.0                     | 890.6                                     | 771.8                                     | 3119.7                                   |
| <b>29</b> | 1.647                    | 1.731                    | 1.014                   | 1.685                     | 169.8                     | 946.7                                     | 767.9                                     | 2876.2                                   |
| <b>30</b> | 1.639                    | 1.727                    | 1.044                   | 1.576                     | 176.9                     | 963.0                                     | 781.4                                     | 2306.9                                   |
| <b>31</b> | 1.640                    | 1.731                    | 1.031                   | 1.598                     | 171.9                     | 961.1                                     | 766.9                                     | 2575.5                                   |
| <b>32</b> | 1.639                    | 1.729                    | 1.035                   | 1.588                     | 176.4                     | 961.8                                     | 762.5                                     | 2480.6                                   |
| <b>33</b> | 1.641                    | 1.729                    | 1.038                   | 1.573                     | 172.6                     | 957.0                                     | 770.2                                     | 2443.4                                   |
| <b>34</b> | 1.637                    | 1.732                    | 1.016                   | 1.639                     | 176.5                     | 966.3                                     | 769.3                                     | 2847.0                                   |
| <b>35</b> | 1.644                    | 1.721                    | 1.075                   | 1.477                     | 177.2                     | 950.9                                     | 797.9                                     | 1835.5                                   |
| <b>36</b> | 1.648                    | 1.718                    | 1.078                   | 1.483                     | 177.1                     | 941.7                                     | 787.6                                     | 1787.8                                   |
| <b>37</b> | 1.668                    | 1.668                    | 1.640                   | 1.050                     | 175.5                     | 874.6                                     | 867.5                                     | 2876.1                                   |
| <b>38</b> | 1.656                    | 1.673                    | 1.652                   | 1.053                     | 177.9                     | 904.8                                     | 861.3                                     | 2817.8                                   |
| <b>39</b> | 1.657                    | 1.670                    | 1.730                   | 1.043                     | 178.2                     | 902.9                                     | 865.5                                     | 3004.5                                   |
| <b>40</b> | 1.659                    | 1.669                    | 1.830                   | 1.045                     | 174.0                     | 900.4                                     | 869.8                                     | 3084.1                                   |
| <b>41</b> | 1.659                    | 1.674                    | 1.950                   | 1.030                     | 157.5                     | 893.6                                     | 858.2                                     | 3311.1                                   |
| <b>42</b> | 1.662                    | 1.666                    | 1.924                   | 1.032                     | 178.2                     | 892.8                                     | 876.4                                     | 3264.6                                   |
| <b>43</b> | 1.664                    | 1.663                    | 2.105                   | 1.025                     | 177.8                     | 893.4                                     | 881.9                                     | 3402.9                                   |
| <b>44</b> | 1.660                    | 1.670                    | 2.620                   | 1.023                     | 114.0                     | 896.8                                     | 868.3                                     | 3471.0                                   |

**Table S7.** Selected of geometric and IR spectral parameters of complexes **45–82** with hydrogen bond As=O...HA in a vacuum ( $\varepsilon = 1$ ): interatomic distances ( $r_{\text{As=O}}$ ,  $r_{\text{As-O}}$ ,  $r_{\text{O-H}}$ ,  $r_{\text{As=O...H}}$  and  $r_{\text{H-A}}$ ), angle ( $\angle\text{OHA}$ ) and stretching vibrational frequencies ( $\nu_{\text{As=O}}$ ,  $\nu_{\text{As-O}}$  and  $\nu_{\text{O-H}}$ ). Numbering of complexes in accordance with Scheme 3.

|    | $r_{\text{As=O}}$ ,<br>Å | $r_{\text{As-O}}$ ,<br>Å | $r_{\text{O-H}}$ ,<br>Å | $r_{\text{As=O...H}}$ ,<br>Å | $r_{\text{H-A}}$ ,<br>Å | $\angle\text{OHA}$ ,<br>° | $\nu_{\text{As=O}}$ ,<br>cm <sup>-1</sup> | $\nu_{\text{As-O}}$ ,<br>cm <sup>-1</sup> | $\nu_{\text{OH}}$ ,<br>cm <sup>-1</sup> |
|----|--------------------------|--------------------------|-------------------------|------------------------------|-------------------------|---------------------------|-------------------------------------------|-------------------------------------------|-----------------------------------------|
| 45 | 1.626                    | 1.749                    | 0.972                   | 2.203                        | 1.086                   | 129.7                     | 1001.3                                    | 743.4                                     | 3211.8                                  |
| 46 | 1.630                    | 1.743                    | 0.981                   | 2.121                        | 1.016                   | 149.4                     | 990.5                                     | 754.2                                     | 3575.0                                  |
| 47 | 1.627                    | 1.745                    | 0.976                   | 2.159                        | 1.091                   | 155.7                     | 997.6                                     | 752.2                                     | 3105.8                                  |
| 48 | 1.626                    | 1.749                    | 0.972                   | 2.151                        | 1.087                   | 133.9                     | 999.7                                     | 744.1                                     | 3190.1                                  |
| 49 | 1.626                    | 1.748                    | 0.973                   | 2.150                        | 1.087                   | 145.0                     | 1000.7                                    | 747.1                                     | 3220.8                                  |
| 50 | 1.625                    | 1.750                    | 0.971                   | 2.151                        | 1.090                   | 145.8                     | 1003.0                                    | 743.2                                     | 3176.5                                  |
| 51 | 1.636                    | 1.735                    | 1.001                   | 1.865                        | 0.984                   | 148.6                     | 974.5                                     | 768.3                                     | 3493.2                                  |
| 52 | 1.630                    | 1.751                    | 0.970                   | 1.824                        | 0.979                   | 158.6                     | 988.0                                     | 744.1                                     | 3550.1                                  |
| 53 | 1.639                    | 1.732                    | 0.989                   | 1.798                        | 0.994                   | 145.0                     | 977.3                                     | 766.6                                     | 3387.8                                  |
| 54 | 1.634                    | 1.743                    | 0.979                   | 1.776                        | 0.989                   | 154.6                     | 978.0                                     | 748.5                                     | 3604.7                                  |
| 55 | 1.628                    | 1.746                    | 0.981                   | 2.112                        | 1.349                   | 149.1                     | 993.3                                     | 749.4                                     | 2644.9                                  |
| 56 | 1.637                    | 1.738                    | 0.983                   | 1.712                        | 0.992                   | 158.9                     | 969.4                                     | 763.6                                     | 3292.7                                  |
| 57 | 1.636                    | 1.738                    | 0.975                   | 1.679                        | 0.996                   | 161.9                     | 972.5                                     | 763.3                                     | 3251.5                                  |
| 58 | 1.636                    | 1.732                    | 1.000                   | 1.674                        | 0.997                   | 171.1                     | 974.2                                     | 775.0                                     | 3146.3                                  |
| 59 | 1.631                    | 1.744                    | 0.971                   | 1.653                        | 0.998                   | 170.6                     | 987.7                                     | 752.0                                     | 3210.1                                  |
| 60 | 1.639                    | 1.735                    | 0.982                   | 1.588                        | 0.966                   | 159.4                     | 965.7                                     | 769.9                                     | 3583.4                                  |
| 61 | 1.635                    | 1.739                    | 0.973                   | 1.582                        | 1.011                   | 172.2                     | 978.9                                     | 762.5                                     | 3001.7                                  |
| 62 | 1.634                    | 1.738                    | 0.973                   | 1.572                        | 1.011                   | 176.3                     | 1000.8                                    | 792.9                                     | 3069.7                                  |
| 63 | 1.643                    | 1.723                    | 1.003                   | 1.569                        | 1.020                   | 167.4                     | 958.4                                     | 795.5                                     | 2846.3                                  |
| 64 | 1.639                    | 1.735                    | 0.979                   | 1.547                        | 1.024                   | 177.2                     | 965.5                                     | 769.4                                     | 2774.2                                  |
| 65 | 1.639                    | 1.734                    | 0.970                   | 1.571                        | 1.058                   | 169.2                     | 985.0                                     | 770.1                                     | 3785.3                                  |
| 66 | 1.640                    | 1.724                    | 0.992                   | 1.516                        | 1.030                   | 177.1                     | 968.4                                     | 792.7                                     | 2674.8                                  |
| 67 | 1.640                    | 1.724                    | 0.993                   | 1.515                        | 1.030                   | 176.7                     | 968.4                                     | 793.1                                     | 2662.6                                  |
| 68 | 1.641                    | 1.724                    | 0.990                   | 1.489                        | 1.036                   | 177.6                     | 967.9                                     | 792.4                                     | 2571.5                                  |
| 69 | 1.646                    | 1.725                    | 0.991                   | 1.488                        | 1.041                   | 168.1                     | 956.9                                     | 788.1                                     | 2505.9                                  |
| 70 | 1.641                    | 1.731                    | 0.970                   | 1.520                        | 1.073                   | 166.3                     | 979.2                                     | 774.6                                     | 3783.1                                  |
| 71 | 1.643                    | 1.733                    | 0.976                   | 1.469                        | 1.046                   | 176.1                     | 955.1                                     | 773.2                                     | 2441.9                                  |
| 72 | 1.642                    | 1.730                    | 0.970                   | 1.455                        | 1.095                   | 170.5                     | 981.1                                     | 778.0                                     | 2295.1                                  |
| 73 | 1.647                    | 1.730                    | 0.981                   | 1.420                        | 1.062                   | 176.9                     | 938.5                                     | 777.1                                     | 2173.1                                  |
| 74 | 1.686                    | 1.714                    | 0.979                   | 1.035                        | 1.491                   | 174.9                     | 808.4                                     | 875.7                                     | 2580.9                                  |
| 75 | 1.683                    | 1.709                    | 0.972                   | 1.018                        | 1.545                   | 176.2                     | 879.8                                     | 806.3                                     | 2875.0                                  |
| 76 | 1.682                    | 1.712                    | 0.973                   | 1.041                        | 1.568                   | 172.1                     | 879.7                                     | 803.8                                     | 3750.2                                  |
| 77 | 1.696                    | 1.696                    | 1.002                   | 1.002                        | 1.592                   | 167.1                     | 859.9                                     | 829.6                                     | 3223.2                                  |
| 78 | 1.700                    | 1.700                    | 1.002                   | 1.002                        | 1.685                   | 166.9                     | 852.4                                     | 820.7                                     | 3202.2                                  |
| 79 | 1.681                    | 1.713                    | 0.973                   | 1.060                        | 1.883                   | 177.1                     | 875.1                                     | 800.4                                     | 3751.9                                  |
| 80 | 1.700                    | 1.703                    | 0.976                   | 0.982                        | 1.868                   | 169.8                     | 845.4                                     | 813.7                                     | 3705.6                                  |
| 81 | 1.700                    | 1.703                    | 0.975                   | 0.980                        | 1.902                   | 168.8                     | 844.7                                     | 813.9                                     | 3708.6                                  |
| 82 | 1.689                    | 1.708                    | 0.973                   | 1.012                        | 2.082                   | 177.4                     | 861.2                                     | 808.4                                     | 2968.0                                  |



**Table S8.** Selected of geometric and IR spectral parameters of complexes **45–82** with hydrogen bond As=O...HA in a media with  $\epsilon = 40$ : interatomic distances ( $r_{\text{As=O}}$ ,  $r_{\text{As-O}}$ ,  $r_{\text{O-H}}$ ,  $r_{\text{As=O...H}}$  and  $r_{\text{H-A}}$ ), angle ( $\angle\text{OHA}$ ) and stretching vibrational frequencies ( $\nu_{\text{As=O}}$ ,  $\nu_{\text{As-O}}$  and  $\nu_{\text{O-H}}$ ). Numbering of complexes in accordance with Scheme 3.

|           | $r_{\text{As=O}}$ ,<br>Å | $r_{\text{As-O}}$ ,<br>Å | $r_{\text{O-H}}$ ,<br>Å | $r_{\text{As=O...H}}$ ,<br>Å | $r_{\text{H-A}}$ ,<br>Å | $\angle\text{OHA}$ ,<br>° | $\nu_{\text{As=O}}$ ,<br>cm <sup>-1</sup> | $\nu_{\text{As-O}}$ ,<br>cm <sup>-1</sup> | $\nu_{\text{OH}}$ ,<br>cm <sup>-1</sup> |
|-----------|--------------------------|--------------------------|-------------------------|------------------------------|-------------------------|---------------------------|-------------------------------------------|-------------------------------------------|-----------------------------------------|
| <b>45</b> | 1.64                     | 1.75                     | 0.97                    | 2.12                         | 1.09                    | 152.0                     | 970.3                                     | 724.9                                     | 3184.2                                  |
| <b>46</b> | 1.64                     | 1.75                     | 0.98                    | 2.51                         | 1.01                    | 174.7                     | 969.2                                     | 730.6                                     | 3547.8                                  |
| <b>47</b> | 1.63                     | 1.75                     | 0.98                    | 2.34                         | 1.09                    | 148.8                     | 973.1                                     | 731.0                                     | 3129.9                                  |
| <b>48</b> | 1.64                     | 1.75                     | 0.97                    | 2.06                         | 1.09                    | 157.5                     | 968.7                                     | 725.3                                     | 3150.6                                  |
| <b>49</b> | 1.63                     | 1.75                     | 0.97                    | 2.14                         | 1.09                    | 154.6                     | 971.2                                     | 724.4                                     | 3208.1                                  |
| <b>50</b> | 1.63                     | 1.75                     | 0.97                    | 2.07                         | 1.09                    | 170.8                     | 971.5                                     | 722.9                                     | 3138.0                                  |
| <b>51</b> | 1.65                     | 1.74                     | 1.00                    | 1.83                         | 0.99                    | 152.2                     | 947.8                                     | 746.2                                     | 3441.5                                  |
| <b>52</b> | 1.64                     | 1.75                     | 0.97                    | 1.72                         | 0.99                    | 175.9                     | 961.5                                     | 732.0                                     | 3401.1                                  |
| <b>53</b> | 1.65                     | 1.74                     | 0.98                    | 1.70                         | 1.01                    | 151.3                     | 945.4                                     | 742.7                                     | 3156.1                                  |
| <b>54</b> | 1.64                     | 1.75                     | 0.97                    | 1.65                         | 1.00                    | 177.1                     | 954.6                                     | 733.6                                     | 3766.6                                  |
| <b>55</b> | 1.64                     | 1.75                     | 0.98                    | 2.16                         | 1.35                    | 152.4                     | 965.7                                     | 728.2                                     | 2652.5                                  |
| <b>56</b> | 1.65                     | 1.74                     | 0.98                    | 1.70                         | 0.99                    | 159.7                     | 944.5                                     | 739.8                                     | 3244.9                                  |
| <b>57</b> | 1.65                     | 1.74                     | 0.98                    | 1.61                         | 1.00                    | 171.1                     | 949.5                                     | 749.0                                     | 3077.7                                  |
| <b>58</b> | 1.65                     | 1.74                     | 0.99                    | 1.62                         | 1.00                    | 176.0                     | 949.2                                     | 751.4                                     | 3052.3                                  |
| <b>59</b> | 1.64                     | 1.75                     | 0.97                    | 1.61                         | 1.01                    | 167.7                     | 955.2                                     | 736.9                                     | 3041.1                                  |
| <b>60</b> | 1.65                     | 1.74                     | 0.98                    | 1.49                         | 0.98                    | 167.8                     | 939.9                                     | 747.3                                     | 3658.9                                  |
| <b>61</b> | 1.65                     | 1.74                     | 0.97                    | 1.49                         | 1.03                    | 177.0                     | 949.3                                     | 744.5                                     | 2606.3                                  |
| <b>62</b> | 1.65                     | 1.74                     | 0.97                    | 1.48                         | 1.04                    | 176.5                     | 943.9                                     | 746.0                                     | 2514.3                                  |
| <b>63</b> | 1.65                     | 1.73                     | 1.00                    | 1.53                         | 1.03                    | 170.8                     | 891.1                                     | 772.4                                     | 2662.6                                  |
| <b>64</b> | 1.65                     | 1.73                     | 1.00                    | 1.55                         | 1.02                    | 172.3                     | 948.6                                     | 773.8                                     | 2755.4                                  |
| <b>65</b> | 1.64                     | 1.74                     | 0.97                    | 1.58                         | 1.06                    | 174.4                     | 954.5                                     | 740.9                                     | 3761.8                                  |
| <b>66</b> | 1.65                     | 1.73                     | 0.99                    | 1.44                         | 1.05                    | 174.3                     | 940.8                                     | 768.8                                     | 2228.0                                  |
| <b>67</b> | 1.65                     | 1.73                     | 0.99                    | 1.46                         | 1.05                    | 173.4                     | 939.8                                     | 769.2                                     | 2305.9                                  |
| <b>68</b> | 1.66                     | 1.73                     | 0.99                    | 1.38                         | 1.08                    | 175.3                     | 858.3                                     | 767.7                                     | 1914.3                                  |
| <b>69</b> | 1.70                     | 1.71                     | 0.99                    | 1.03                         | 1.52                    | 175.6                     | 841.0                                     | 795.9                                     | 2574.0                                  |
| <b>70</b> | 1.64                     | 1.74                     | 0.97                    | 1.59                         | 1.06                    | 168.7                     | 956.0                                     | 740.3                                     | 3761.1                                  |
| <b>71</b> | 1.65                     | 1.73                     | 0.99                    | 1.44                         | 1.05                    | 174.5                     | 940.0                                     | 768.0                                     | 2239.2                                  |
| <b>72</b> | 1.64                     | 1.74                     | 0.97                    | 1.57                         | 1.07                    | 174.6                     | 954.5                                     | 741.9                                     | 3765.8                                  |
| <b>73</b> | 1.69                     | 1.71                     | 0.99                    | 1.03                         | 1.50                    | 178.8                     | 845.7                                     | 794.2                                     | 2574.8                                  |
| <b>74</b> | 1.70                     | 1.71                     | 0.98                    | 1.01                         | 1.60                    | 177.2                     | 835.0                                     | 799.0                                     | 2987.2                                  |
| <b>75</b> | 1.69                     | 1.72                     | 0.97                    | 1.02                         | 1.55                    | 177.9                     | 850.9                                     | 789.0                                     | 3743.7                                  |
| <b>76</b> | 1.69                     | 1.72                     | 0.97                    | 1.04                         | 1.56                    | 177.2                     | 856.7                                     | 782.7                                     | 3746.1                                  |
| <b>77</b> | 1.71                     | 1.71                     | 0.99                    | 0.99                         | 1.71                    | 166.9                     | 823.7                                     | 807.6                                     | 3436.2                                  |
| <b>78</b> | 1.71                     | 1.71                     | 0.99                    | 0.99                         | 1.75                    | 169.4                     | 823.1                                     | 807.1                                     | 3323.9                                  |
| <b>79</b> | 1.70                     | 1.71                     | 0.97                    | 1.02                         | 2.02                    | 176.3                     | 834.1                                     | 791.2                                     | 3748.5                                  |
| <b>80</b> | 1.70                     | 1.71                     | 0.97                    | 1.01                         | 1.60                    | 177.9                     | 842.6                                     | 792.9                                     | 3731.8                                  |
| <b>81</b> | 1.71                     | 0.98                     | 0.98                    | 0.98                         | 1.86                    | 168.0                     | 812.6                                     | 802.0                                     | 3684.6                                  |
| <b>82</b> | 1.70                     | 1.71                     | 0.97                    | 1.00                         | 2.17                    | 177.4                     | 826.0                                     | 795.6                                     | 3738.2                                  |

**Table S9.** Selected of geometric and IR spectral parameters of complexes **45–82** with hydrogen bond As=O...HA in a media with  $\epsilon = 80$ : interatomic distances ( $r_{\text{As=O}}$ ,  $r_{\text{As-O}}$ ,  $r_{\text{O-H}}$ ,  $r_{\text{As=O...H}}$  and  $r_{\text{H-A}}$ ), angle ( $\angle\text{OHA}$ ) and stretching vibrational frequencies ( $\nu_{\text{As=O}}$ ,  $\nu_{\text{As-O}}$  and  $\nu_{\text{O-H}}$ ). Numbering of complexes in accordance with Scheme 3.

|           | $r_{\text{As=O}}$ ,<br>Å | $r_{\text{As-O}}$ ,<br>Å | $r_{\text{O-H}}$ ,<br>Å | $r_{\text{As=O...H}}$ ,<br>Å | $r_{\text{H-A}}$ ,<br>Å | $\angle\text{OHA}$ ,<br>° | $\nu_{\text{As=O}}$ ,<br>cm <sup>-1</sup> | $\nu_{\text{As-O}}$ ,<br>cm <sup>-1</sup> | $\nu_{\text{OH}}$ ,<br>cm <sup>-1</sup> |
|-----------|--------------------------|--------------------------|-------------------------|------------------------------|-------------------------|---------------------------|-------------------------------------------|-------------------------------------------|-----------------------------------------|
| <b>45</b> | 1.64                     | 1.75                     | 0.97                    | 2.12                         | 1.09                    | 152.2                     | 969.5                                     | 724.6                                     | 3183.7                                  |
| <b>46</b> | 1.64                     | 1.75                     | 0.98                    | 2.53                         | 1.01                    | 110.2                     | 968.8                                     | 730.1                                     | 3547.0                                  |
| <b>47</b> | 1.63                     | 1.75                     | 0.98                    | 2.35                         | 1.09                    | 148.9                     | 972.4                                     | 730.5                                     | 3657.5                                  |
| <b>48</b> | 1.64                     | 1.75                     | 0.97                    | 2.06                         | 1.09                    | 158.1                     | 967.9                                     | 724.8                                     | 3149.4                                  |
| <b>49</b> | 1.63                     | 1.75                     | 0.97                    | 2.14                         | 1.09                    | 156.2                     | 970.3                                     | 724.2                                     | 3206.3                                  |
| <b>50</b> | 1.63                     | 1.75                     | 0.97                    | 2.07                         | 1.09                    | 171.4                     | 970.4                                     | 722.6                                     | 3771.8                                  |
| <b>51</b> | 1.65                     | 1.74                     | 1.00                    | 1.82                         | 0.99                    | 152.3                     | 947.3                                     | 745.7                                     | 3194.9                                  |
| <b>52</b> | 1.64                     | 1.75                     | 0.97                    | 1.72                         | 0.99                    | 176.0                     | 960.8                                     | 731.8                                     | 3396.8                                  |
| <b>53</b> | 1.65                     | 1.74                     | 0.98                    | 1.69                         | 1.01                    | 151.6                     | 944.8                                     | 741.8                                     | 3145.0                                  |
| <b>54</b> | 1.64                     | 1.75                     | 0.98                    | 1.67                         | 1.00                    | 166.6                     | 949.4                                     | 733.7                                     | 3185.7                                  |
| <b>55</b> | 1.64                     | 1.75                     | 0.98                    | 2.16                         | 1.35                    | 152.6                     | 965.0                                     | 727.7                                     | 2652.0                                  |
| <b>56</b> | 1.65                     | 1.74                     | 0.98                    | 1.70                         | 0.99                    | 169.7                     | 944.0                                     | 739.2                                     | 3243.6                                  |
| <b>57</b> | 1.65                     | 1.74                     | 0.98                    | 1.61                         | 1.00                    | 171.3                     | 949.1                                     | 748.5                                     | 3072.8                                  |
| <b>58</b> | 1.65                     | 1.74                     | 0.99                    | 1.61                         | 1.01                    | 176.1                     | 948.6                                     | 750.9                                     | 3048.1                                  |
| <b>59</b> | 1.64                     | 1.75                     | 0.97                    | 1.61                         | 1.01                    | 167.6                     | 954.5                                     | 736.7                                     | 3038.1                                  |
| <b>60</b> | 1.65                     | 1.74                     | 0.98                    | 1.48                         | 0.98                    | 168.0                     | 939.3                                     | 746.8                                     | 2817.5                                  |
| <b>61</b> | 1.65                     | 1.74                     | 0.97                    | 1.49                         | 1.03                    | 176.9                     | 948.7                                     | 744.3                                     | 2588.0                                  |
| <b>62</b> | 1.65                     | 1.74                     | 0.97                    | 1.47                         | 1.04                    | 176.4                     | 936.1                                     | 744.7                                     | 2473.5                                  |
| <b>63</b> | 1.65                     | 1.73                     | 1.00                    | 1.53                         | 1.03                    | 170.8                     | 940.4                                     | 771.8                                     | 2657.4                                  |
| <b>64</b> | 1.65                     | 1.73                     | 1.00                    | 1.55                         | 1.02                    | 172.2                     | 948.1                                     | 773.2                                     | 2750.4                                  |
| <b>65</b> | 1.64                     | 1.74                     | 0.97                    | 1.60                         | 1.06                    | 168.8                     | 953.2                                     | 760.1                                     | 3757.8                                  |
| <b>66</b> | 1.65                     | 1.73                     | 0.99                    | 1.44                         | 1.05                    | 174.2                     | 876.5                                     | 768.2                                     | 2214.3                                  |
| <b>67</b> | 1.65                     | 1.74                     | 0.98                    | 1.61                         | 1.00                    | 171.2                     | 935.9                                     | 769.0                                     | 2301.1                                  |
| <b>68</b> | 1.66                     | 1.73                     | 0.99                    | 1.38                         | 1.08                    | 175.2                     | 856.1                                     | 767.3                                     | 1899.9                                  |
| <b>69</b> | 1.70                     | 1.71                     | 0.99                    | 1.03                         | 1.52                    | 175.6                     | 840.3                                     | 796.1                                     | 2582.9                                  |
| <b>70</b> | 1.64                     | 1.74                     | 0.97                    | 1.59                         | 1.06                    | 174.3                     | 953.5                                     | 740.7                                     | 3768.7                                  |
| <b>71</b> | 1.65                     | 1.73                     | 0.99                    | 1.44                         | 1.05                    | 174.5                     | 939.5                                     | 767.5                                     | 2223.9                                  |
| <b>72</b> | 1.64                     | 1.74                     | 0.97                    | 1.58                         | 1.07                    | 174.8                     | 953.7                                     | 741.2                                     | 3765.8                                  |
| <b>73</b> | 1.69                     | 1.71                     | 0.99                    | 1.03                         | 1.50                    | 178.7                     | 844.4                                     | 794.2                                     | 2588.8                                  |
| <b>74</b> | 1.70                     | 1.71                     | 0.98                    | 1.01                         | 1.60                    | 177.2                     | 833.7                                     | 798.8                                     | 2998.3                                  |
| <b>75</b> | 1.69                     | 1.72                     | 0.97                    | 1.02                         | 1.55                    | 178.0                     | 835.1                                     | 799.1                                     | 3014.3                                  |
| <b>76</b> | 1.69                     | 1.72                     | 0.97                    | 1.04                         | 1.56                    | 177.3                     | 850.3                                     | 788.5                                     | 3742.8                                  |
| <b>77</b> | 1.71                     | 1.71                     | 0.99                    | 0.99                         | 1.72                    | 166.8                     | 856.2                                     | 782.9                                     | 3744.7                                  |
| <b>78</b> | 1.71                     | 1.71                     |                         | 0.99                         | 1.75                    | 169.4                     | 822.7                                     | 807.0                                     | 3441.6                                  |
| <b>79</b> | 1.70                     | 1.71                     | 0.97                    | 1.02                         | 2.02                    | 176.1                     | 822.2                                     | 806.6                                     | 3329.4                                  |
| <b>80</b> | 1.70                     | 1.72                     | 0.97                    | 1.01                         | 1.60                    | 177.9                     | 833.6                                     | 790.8                                     | 3748.2                                  |
| <b>81</b> | 1.71                     | 1.71                     | 0.98                    | 0.98                         | 1.86                    | 167.9                     | 841.7                                     | 792.1                                     | 3732.1                                  |
| <b>82</b> | 1.70                     | 1.71                     | 0.97                    | 1.00                         | 2.17                    | 177.6                     | 811.9                                     | 801.7                                     | 3678.9                                  |

**Table S10.** Selected geometric parameters of H<sub>2</sub>As(O)OH monomer **1** in a dielectric continuum with various  $\epsilon$ : interatomic distances ( $r_{\text{As-O}}$ ,  $r_{\text{As=O}}$ ,  $r_{\text{OH}}$  and  $r_{\text{AsH}}$ ), angles (OAsO and HAsH) and dihedral angle OAsOH.

| $\epsilon$ | $r_{\text{As-O}}, \text{\AA}$ | $r_{\text{As=O}}, \text{\AA}$ | $r_{\text{OH}}, \text{\AA}$ | $r_{\text{AsH}}, \text{\AA}$ | $\angle\text{OAsO}, ^\circ$ | $\angle\text{HAsH}, ^\circ$ | $\angle\text{OAsOH}, ^\circ$ |
|------------|-------------------------------|-------------------------------|-----------------------------|------------------------------|-----------------------------|-----------------------------|------------------------------|
| 1          | 1.758                         | 1.621                         | 0.970                       | 1.501                        | 114                         | 105                         | 0                            |
| 5          | 1.755                         | 1.628                         | 0.970                       | 1.498                        | 115                         | 107                         | 37                           |
| 10         | 1.755                         | 1.630                         | 0.970                       | 1.496                        | 115                         | 108                         | 54                           |
| 20         | 1.755                         | 1.630                         | 0.970                       | 1.497                        | 115                         | 107                         | 47                           |
| 40         | 1.755                         | 1.631                         | 0.970                       | 1.496                        | 115                         | 107                         | 51                           |
| 80         | 1.755                         | 1.631                         | 0.970                       | 1.491                        | 115                         | 108                         | 53                           |

**Table S11.** Selected geometric parameters of H<sub>2</sub>AsO<sub>2</sub><sup>-</sup> anion **2** in a dielectric continuum with various  $\epsilon$ : interatomic distances ( $r_{\text{As-O}}$  and  $r_{\text{AsH}}$ ) and angles (OAsO and HAsH).

| $\epsilon$ | $r_{\text{As-O}}, \text{\AA}$ | $r_{\text{AsH}}, \text{\AA}$ | $\angle\text{OAsO}, ^\circ$ | $\angle\text{HAsH}, ^\circ$ |
|------------|-------------------------------|------------------------------|-----------------------------|-----------------------------|
| 1          | 1.654                         | 1.539                        | 123                         | 99                          |
| 5          | 1.658                         | 1.524                        | 120                         | 101                         |
| 10         | 1.660                         | 1.521                        | 119                         | 101                         |
| 20         | 1.660                         | 1.519                        | 119                         | 101                         |
| 40         | 1.661                         | 1.519                        | 119                         | 102                         |
| 80         | 1.661                         | 1.518                        | 119                         | 102                         |

**Table S12.** Selected geometric parameters of H<sub>2</sub>As(OH)<sub>2</sub><sup>+</sup> cation **3** in a dielectric continuum with various  $\epsilon$ : interatomic distances ( $r_{\text{As-O}}$ ,  $r_{\text{OH}}$  and  $r_{\text{AsH}}$ ), angles (OAsO and HAsH) and dihedral angle (OAsOH).

| $\epsilon$ | $r_{\text{As-O}}, \text{\AA}$ | $r_{\text{OH}}, \text{\AA}$ | $r_{\text{AsH}}, \text{\AA}$ | $\angle\text{OAsO}, ^\circ$ | $\angle\text{HAsH}, ^\circ$ | $\angle\text{OAsOH}, ^\circ$ |
|------------|-------------------------------|-----------------------------|------------------------------|-----------------------------|-----------------------------|------------------------------|
| 1          | 1.702                         | 0.974                       | 1.484                        | 113                         | 115                         | 65                           |
| 5          | 1.706                         | 0.974                       | 1.479                        | 112                         | 116                         | 69                           |
| 10         | 1.707                         | 0.974                       | 1.479                        | 112                         | 116                         | 70                           |
| 20         | 1.708                         | 0.974                       | 1.478                        | 112                         | 116                         | 70                           |
| 40         | 1.708                         | 0.974                       | 1.478                        | 112                         | 116                         | 70                           |

|    |       |       |       |     |     |    |
|----|-------|-------|-------|-----|-----|----|
| 80 | 1.709 | 0.974 | 1.478 | 112 | 116 | 70 |
|----|-------|-------|-------|-----|-----|----|

**Figure S1.** The dependencies of the difference between the band positions  $\Delta\nu = \nu_{\text{As=O}} - \nu_{\text{As-O}}$  and coordinate  $q_1$  for complexes  $\text{H}_2\text{As(O)OH}\cdots\text{B}$  in  $\varepsilon = 1, 5, 10, 20, 40$  and  $80$ , which are approximated by linear functions.

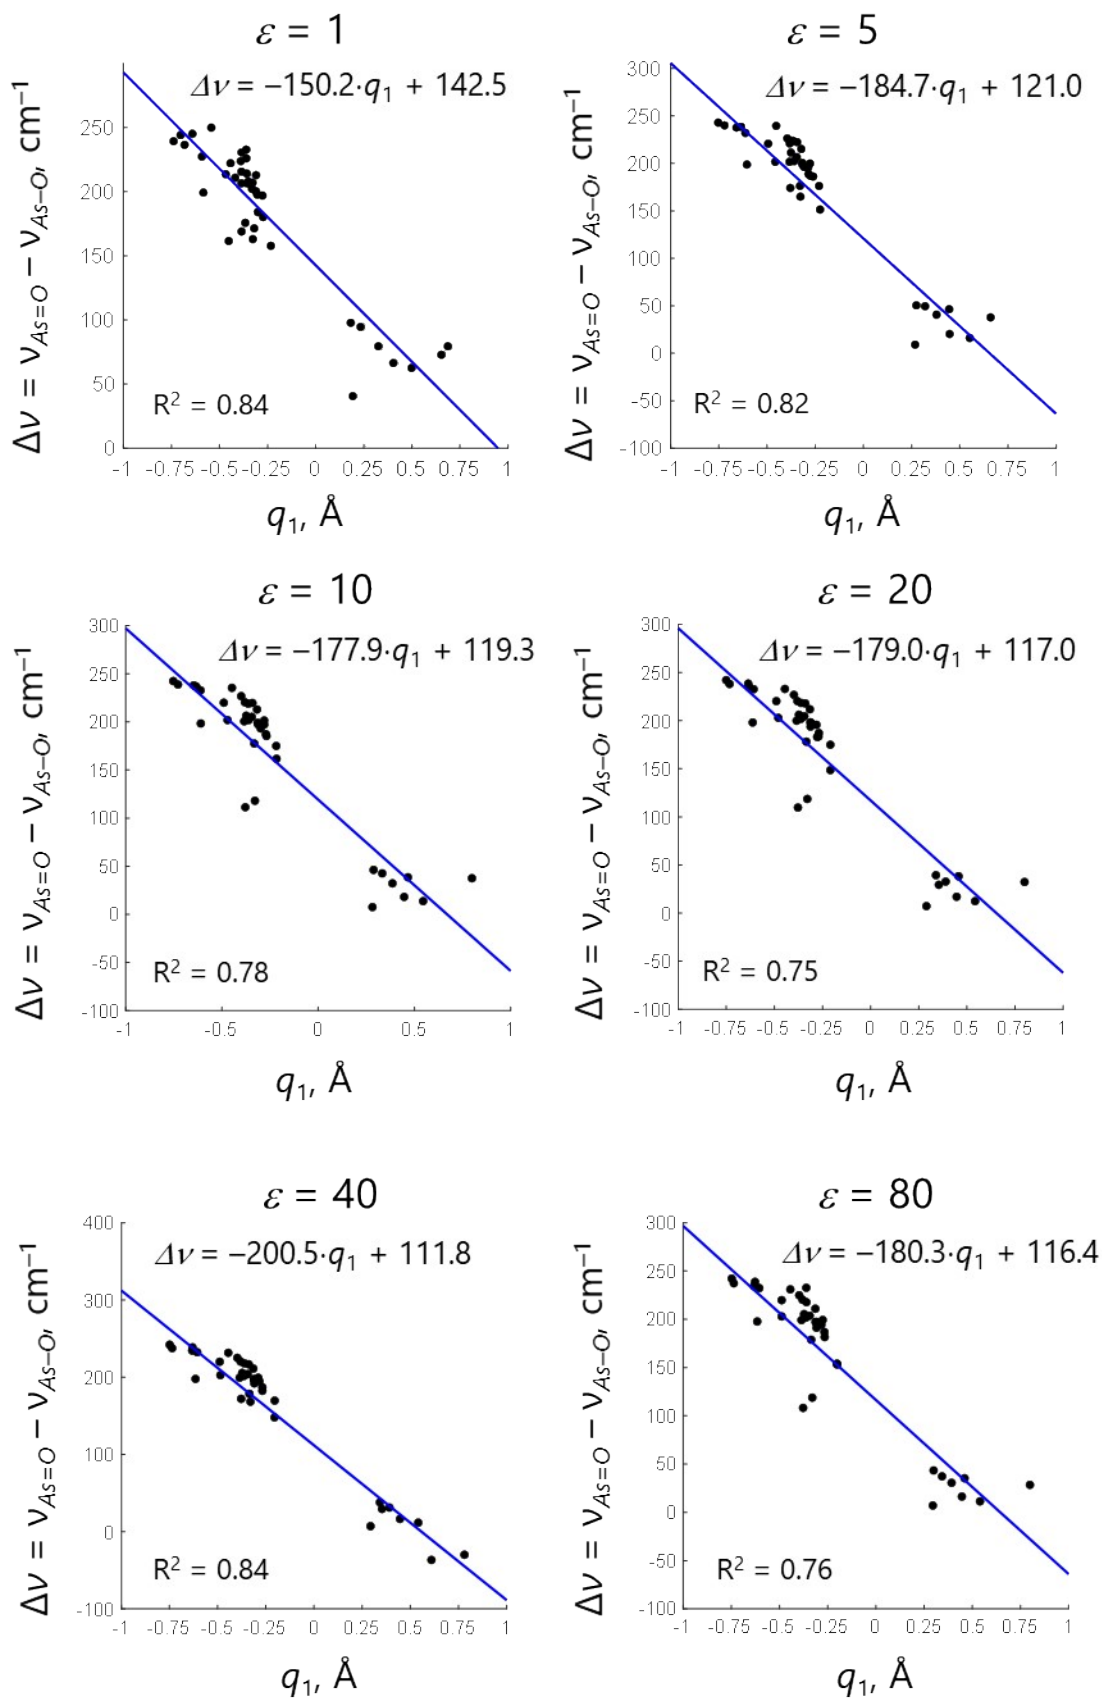

**Figure S2.** The dependencies of the difference between the band positions  $\Delta\nu = \nu_{\text{As=O}} - \nu_{\text{As-O}}$  and coordinate  $q_1$  for complexes  $\text{H}_2\text{As}(\text{OH})\text{O}\cdots\text{HA}$  in  $\varepsilon = 1, 40$  and  $80$ , which are approximated by linear functions.

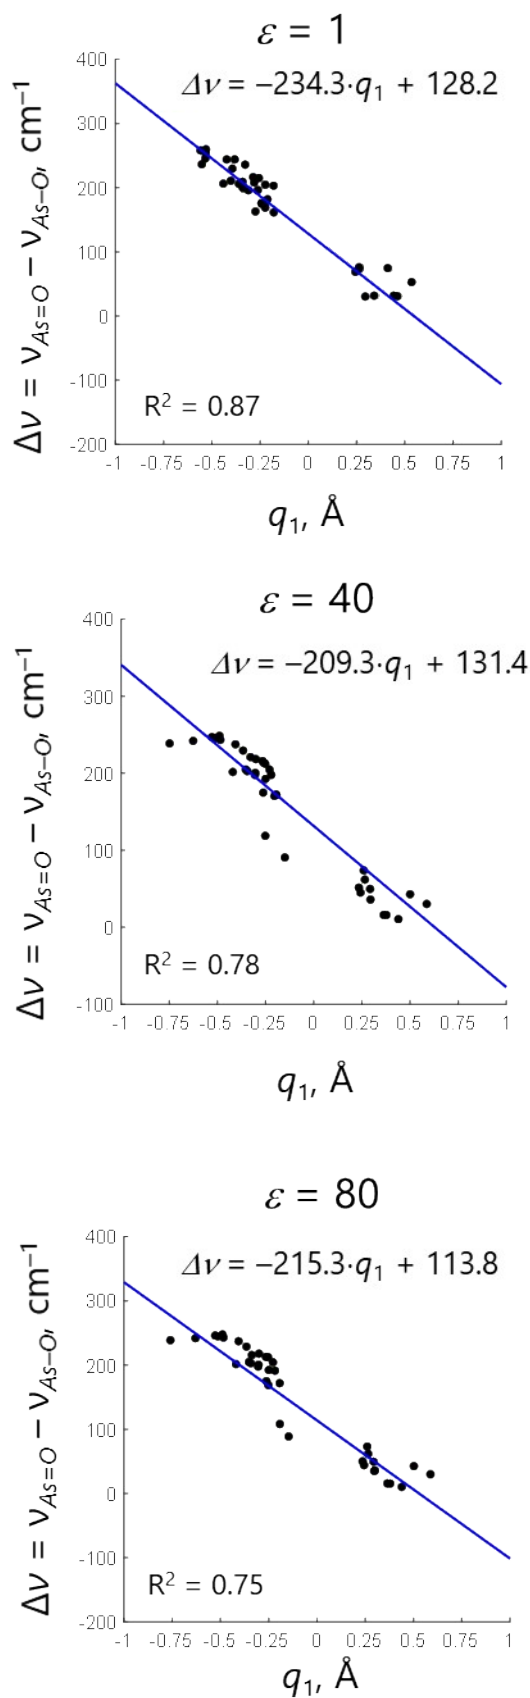

Supplement: d2cp06060d1.pdf [file d2cp06060d1.pdf]
